# Supplementary material for: A facile synthesis of single-crystal mullite nanobelts
Source: Royal Society of Chemistry journal article supplement (doi:10.1039/b409087j), 2004-01-01
Supplement: b409087j.pdf [file b409087j.pdf]

Electronic Supplementary information:

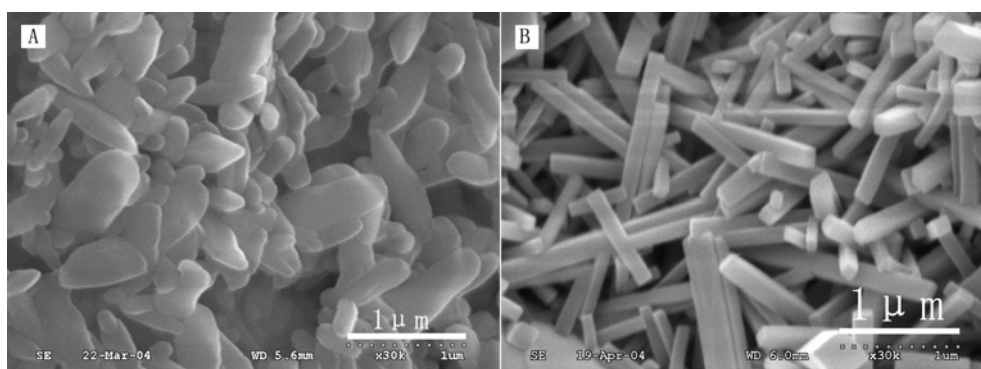

Fig. 1S SEM images of the mullite synthesized at 1200 °C for 5h, the amount of WO<sub>3</sub> catalyst is (A) molar ratio of WO<sub>3</sub> / AlCl<sub>3</sub>=0, (B) molar ratio of WO<sub>3</sub> / AlCl<sub>3</sub>=1:2.

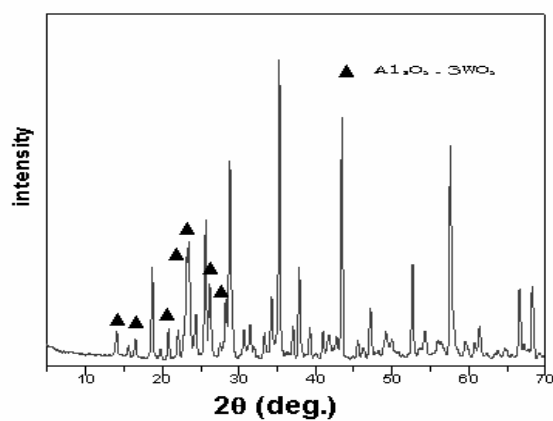

Fig. 2S XRD pattern of mullite precursor calcined at 1000 °C for 5h.

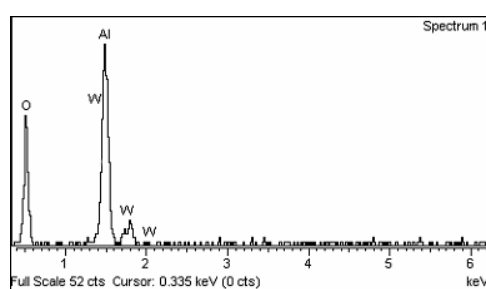

Fig. 3S The analysis of EDX of rod-like precursor calcined at 1000 °C for 5h.
